# Supplementary material for: Peripheral myeloid cells contribute to brain injury in male neonatal mice
Source: PubMed Central journal article supplement (PMC6208095; doi:10.1186/s12974-018-1344-9), 2018-10-30
Supplement: 12974_2018_1344_MOESM1_ESM.pdf [file 12974_2018_1344_MOESM1_ESM.pdf]

**A**

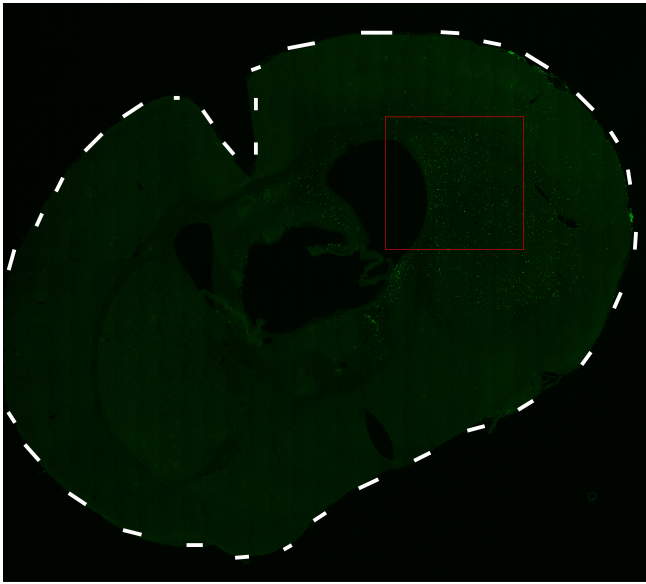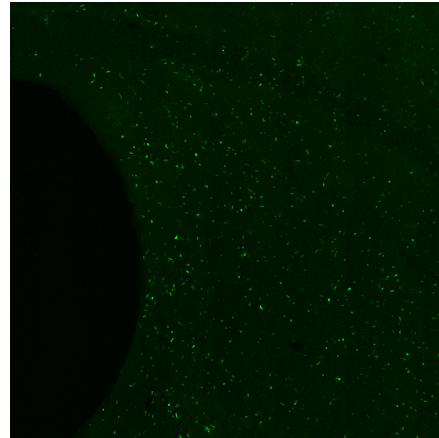

**B**

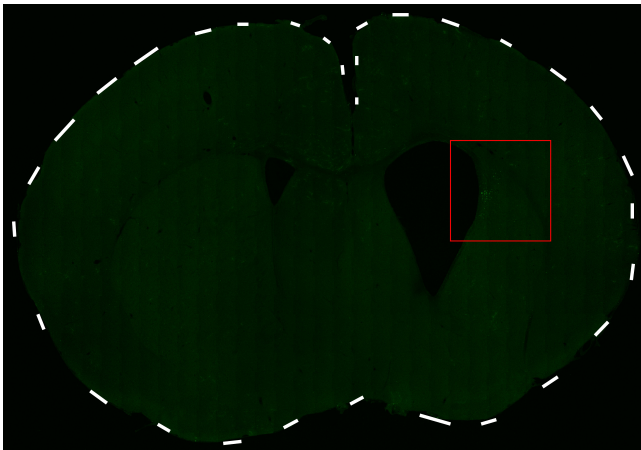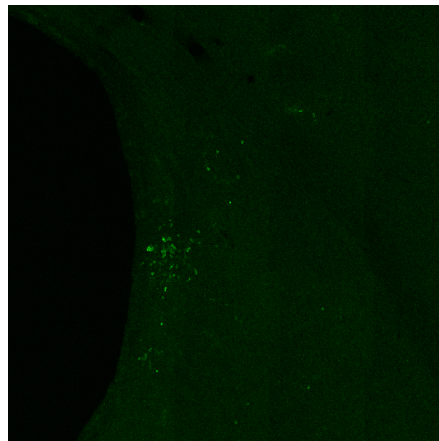

**Supplementary figure 1. EGFP+ myeloid cells localization in the brain after HI**  
Representative tile-scanned confocal images of brain sections after HI. EGFP+ myeloid cells markedly infiltrate the striatum 1 day (**A**) but not 7 day (**B**) after HI. n=4.
