# Supplementary material for: Peripheral myeloid cells contribute to brain injury in male neonatal mice
Source: PubMed Central journal article supplement (PMC6208095; doi:10.1186/s12974-018-1344-9), 2018-10-30
Supplement: 12974_2018_1344_MOESM2_ESM.pdf [file 12974_2018_1344_MOESM2_ESM.pdf]

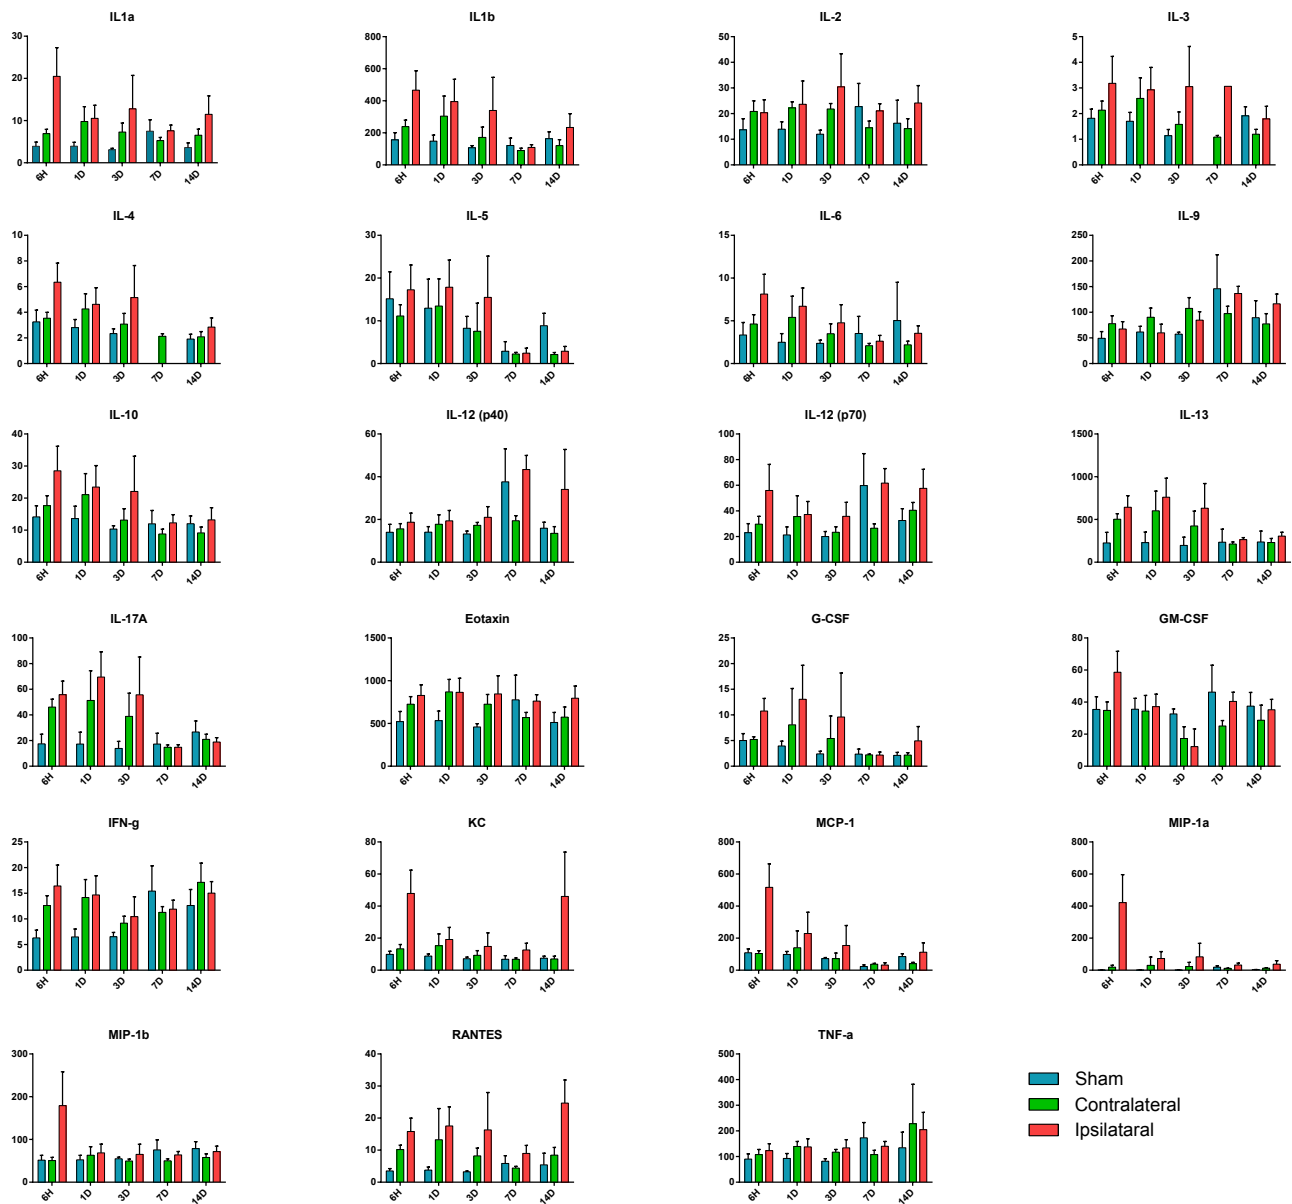

**Supplementary figure 2.** Multiplex cytokine measurement in brain at 6 h, 1 d, 3 d, 7 d and 14 d after neonatal hypoxia-ischemia or sham operation. Values are pg/mg protein and presented as the mean  $\pm$  SD. The statistical results are presented in supplementary table 1.
