# Supplementary material for: Peripheral myeloid cells contribute to brain injury in male neonatal mice
Source: PubMed Central journal article supplement (PMC6208095; doi:10.1186/s12974-018-1344-9), 2018-10-30
Supplement: 12974_2018_1344_MOESM4_ESM.pdf [file 12974_2018_1344_MOESM4_ESM.pdf]

**Supplementary table 1.** Statistical analysis of multiplex cytokine measurement in brain.

|                 | IL1a | IL1b | IL2 | IL5 | IL6 | IL9 | IL10 | IL12 (p40) | IL12 (p70) | IL13 | IL17a | Eotaxin | G-CSF | GM-CSF | IFNg | KC  | MCP-1 | MIP-1a | MIP-1b | RANTES | TNFa |
|-----------------|------|------|-----|-----|-----|-----|------|------------|------------|------|-------|---------|-------|--------|------|-----|-------|--------|--------|--------|------|
| <b>6H</b>       |      |      |     |     |     |     |      |            |            |      |       |         |       |        |      |     |       |        |        |        |      |
| Sham vs. Contra | ns   | ns   | ns  | ns  | ns  | ns  | ns   | ns         | ns         | **   | ***   | *       | ns    | ns     | ***  | ns  | ns    | ns     | ns     | ns     | ns   |
| Sham vs. Ipsi   | ***  | ***  | ns  | ns  | *** | ns  | ***  | ns         | ***        | ***  | ***   | ***     | *     | ***    | ***  | *** | ***   | ***    | ***    | ***    | ***  |
| Contra vs. Ipsi | ***  | ***  | ns  | *   | *** | ns  | ***  | ns         | ***        | ns   | ns    | ns      | *     | ***    | *    | *** | ***   | ***    | ***    | ns     | ns   |
| <b>1D</b>       |      |      |     |     |     |     |      |            |            |      |       |         |       |        |      |     |       |        |        |        |      |
| Sham vs. Contra | *    | *    | ns  | ns  | *   | ns  | *    | ns         | ns         | ***  | ***   | ***     | ns    | ns     | ***  | ns  | ns    | ns     | ns     | **     | ns   |
| Sham vs. Ipsi   | **   | ***  | *   | ns  | *** | ns  | **   | ns         | ns         | ***  | ***   | ***     | ***   | ns     | ***  | ns  | **    | ns     | ns     | ***    | ns   |
| Contra vs. Ipsi | ns   | ns   | ns  | ns  | ns  | *   | ns   | ns         | ns         | ns   | *     | ns      | *     | ns     | ns   | ns  | ns    | ns     | ns     | ns     | ns   |
| <b>3D</b>       |      |      |     |     |     |     |      |            |            |      |       |         |       |        |      |     |       |        |        |        |      |
| Sham vs. Contra | ns   | ns   | *   | ns  | ns  | *** | ns   | ns         | ns         | *    | **    | **      | ns    | **     | ns   | ns  | ns    | ns     | ns     | ns     | ns   |
| Sham vs. Ipsi   | ***  | ***  | *** | *   | *   | ns  | ***  | ns         | ns         | ***  | ***   | ***     | **    | **     | ns   | ns  | ns    | *      | ns     | ***    | ns   |
| Contra vs. Ipsi | **   | **   | *   | **  | ns  | ns  | **   | ns         | ns         | *    | *     | ns      | ns    | ns     | ns   | ns  | ns    | ns     | ns     | **     | ns   |
| <b>7D</b>       |      |      |     |     |     |     |      |            |            |      |       |         |       |        |      |     |       |        |        |        |      |
| Sham vs. Contra | ns   | ns   | ns  | ns  | ns  | *** | ns   | ***        | ***        | ns   | ns    | *       | ns    | ***    | *    | ns  | ns    | ns     | ns     | ns     | ns   |
| Sham vs. Ipsi   | ns   | ns   | ns  | ns  | ns  | ns  | ns   | ns         | ns         | ns   | ns    | ns      | ns    | ns     | ns   | ns  | ns    | ns     | ns     | ns     | ns   |
| Contra vs. Ipsi | ns   | ns   | ns  | ns  | ns  | **  | ns   | ***        | ***        | ns   | ns    | *       | ns    | **     | ns   | ns  | ns    | ns     | ns     | ns     | ns   |
| <b>14D</b>      |      |      |     |     |     |     |      |            |            |      |       |         |       |        |      |     |       |        |        |        |      |
| Sham vs. Contra | ns   | ns   | ns  | *   | *   | ns  | ns   | ns         | ns         | ns   | ns    | ns      | ns    | ns     | *    | ns  | ns    | ns     | ns     | ns     | **   |
| Sham vs. Ipsi   | ***  | ns   | ns  | ns  | ns  | ns  | ns   | ***        | **         | ns   | ns    | **      | ns    | ns     | ns   | *** | ns    | ns     | ns     | ***    | ns   |
| Contra vs. Ipsi | *    | *    | **  | ns  | ns  | **  | ns   | ***        | *          | ns   | ns    | **      | ns    | ns     | ns   | *** | ns    | ns     | ns     | ***    | ns   |

One-way ANOVA followed by Holm-Sidak's post-hoc test for comparing the differences between sham operated mice , HI mice contralateral and ipsilateral hemispheres at each time point. n= 5 for sham group and n= 8 for HI groups. ns: not significant, \*p < 0.05, \*\*p < 0.01, \*\*\*p < 0.001.
