# Supplementary material for: Peripheral myeloid cells contribute to brain injury in male neonatal mice
Source: PubMed Central journal article supplement (PMC6208095; doi:10.1186/s12974-018-1344-9), 2018-10-30
Supplement: 12974_2018_1344_MOESM5_ESM.pdf [file 12974_2018_1344_MOESM5_ESM.pdf]

**Supplementary table 2.** Statistical analysis of multiplex cytokine measurement in plasma.

|     | IL1a | IL1b | IL2 | IL3 | IL4 | IL5 | IL6 | IL10 | IL12 (p40) | IL12 (p70) | IL13 | IL17a | Eotaxin | G-CSF | GM-CSF | IFNg | KC | MCP-1 | MIP-1a | MIP-1b | RANTES | TNFa |    |
|-----|------|------|-----|-----|-----|-----|-----|------|------------|------------|------|-------|---------|-------|--------|------|----|-------|--------|--------|--------|------|----|
| 6H  | ns   | ns   | ns  | ns  | ns  | ns  | ns  | ns   | ns         | ns         | ns   | ns    | ns      | ns    | ns     | ns   | ns | ns    | ns     | ns     | ns     | ns   | ns |
| 1D  | ns   | ns   | ns  | ns  | ns  | ns  | ns  | ns   | ns         | ns         | ns   | ns    | ns      | *     | ns     | ns   | ns | ns    | ns     | ns     | ns     | ns   | ns |
| 3D  | ns   | ns   | ns  | ns  | ns  | ns  | ns  | ns   | ns         | ns         | ns   | ns    | ns      | ns    | ns     | ns   | ns | ns    | ns     | ns     | ns     | ns   | ns |
| 7D  | ns   | ns   | ns  | ns  | ns  | ns  | ns  | ns   | ns         | ns         | ns   | ns    | ns      | ns    | ns     | ns   | ns | ns    | ns     | ns     | ns     | ns   | ns |
| 14D | ns   | *    | ns  | *   | *   | ns  | ns  | ns   | ns         | *          | ns   | ns    | *       | ns    | ns     | ns   | ns | ns    | ns     | ns     | ns     | ns   | ns |

Student *t*-test followed by Holm-Sidak's post-hoc test to correct for multiple comparisons between sham operated mice and HI mice at each time point. n= 5 for sham group and n= 8 for HI groups. ns: not significant, \*p < 0.05
